# Supplementary material for: Kompetenzdiagnose im Wirtschaftsbereich Fußballsport: Das Kompetenzinventar Profifußball (KIPF)
Source: Springer Nature journal article supplement (doi:10.1007/s11612-021-00571-z), 2021-04-21
Supplement: MOESM1 [file 19093156]

| Superordinate Competence | Competence Factor                        | No. | Item | Item Text                                                                                                                    |
|--------------------------|------------------------------------------|-----|------|------------------------------------------------------------------------------------------------------------------------------|
| Professional Competence  | <i>Tactical Knowledge</i>                | 1)  | TW1  | My expertise in football is so high that I could become a coach.                                                             |
|                          |                                          | 2)  | TW2  | I know a lot about tactical nuances in football.                                                                             |
|                          |                                          | 3)  | TW3  | I have a very high understanding of different football tactics.                                                              |
|                          | <i>Knowledge of Nutrition and Health</i> | 4)  | EG1  | Healthy nutrition is an important topic for me.                                                                              |
|                          |                                          | 5)  | EG2  | I pay a lot of attention to eating healthy.                                                                                  |
|                          |                                          | 6)  | EG3  | I am aware of how my diet can protect me from injuries.                                                                      |
| Method Competence        | <i>Use of Resilience Methods</i>         | 7)  | RM1  | When great stress distracts me from my goals, I use certain methods to help me focus again.                                  |
|                          |                                          | 8)  | RM2  | I use relaxation techniques whenever things get too much for me.                                                             |
|                          |                                          | 9)  | RM3  | Certain procedures help me to rank my goals in order of importance.                                                          |
|                          | <i>Dealing with Media</i>                | 10) | ME1  | I feel confident in dealing with the media.                                                                                  |
|                          |                                          | 11) | ME2  | I am competent in dealing with journalists and reporters.                                                                    |
|                          |                                          | 12) | ME3  | I am good at giving public interviews.                                                                                       |
| Social Competence        | <i>Communication Skills</i>              | 13) | KO1  | I solve problems by talking directly to my teammates.                                                                        |
|                          |                                          | 14) | KO2  | If I have a problem with a teammate, I bring it up with him.                                                                 |
|                          |                                          | 15) | KO3  | When I have difficulties with teammates, it helps me to talk to them.                                                        |
|                          | <i>Team Supporting Adaptability</i>      | 16) | TA1  | I always respect the decision of the coach.                                                                                  |
|                          |                                          | 17) | TA2  | If I watch the game from the bench or the stands, I am just as happy about the success of my team as if I would play myself. |
|                          |                                          | 18) | TA2  | I do not care about my success—as long as the team is successful.                                                            |
| Personal Competence      | <i>Mental Strength</i>                   | 19) | MS1  | I doubt myself when I make mistakes in the game. ( <i>inverse</i> )                                                          |
|                          |                                          | 20) | MS2  | I manage to perform to the best of my ability in the game, even under enormous pressure.                                     |
|                          |                                          | 21) | MS3  | Nervousness weighs on me a lot during the game. ( <i>inverse</i> )                                                           |
|                          | <i>Criticism Capacity</i>                | 22) | KR1  | I use every form of criticism to improve my game.                                                                            |
|                          |                                          | 23) | KR2  | I cannot stand being criticised at all. ( <i>inverse</i> )                                                                   |
|                          |                                          | 24) | KR3  | Every form of criticism helps me to improve in football.                                                                     |

*Note.* English items were translated from original German items using a translation/backtranslation procedure; empirical evidence regarding the English version is still pending. This measure is non-proprietary (free) and may be used without permission if the source is cited properly.
